# Supplementary material for: Is MIP-OES a suitable alternative to ICP-OES for trace element analysis?
Source: Royal Society of Chemistry journal article supplement (doi:10.1039/d1ja00375e), 2022-01-01
Supplement: d1ja00375e1.pdf [file d1ja00375e1.pdf]

## SUPPLEMENTARY MATERIAL

### **Is MIP-OES a suitable alternative to ICP-OES for trace element analysis?**

Beatriz M. Fontoura<sup>a</sup>, Florencia Cora Jofré<sup>b,c</sup>, Trey Williams<sup>d</sup>,  
Marianela Savio<sup>b,c</sup>, George L. Donati<sup>e\*</sup> and Joaquim A. Nóbrega<sup>a</sup>

<sup>a</sup>Group for Applied Instrumental Analysis, Department of Chemistry, Federal University of São Carlos, P.O. Box 676, São Carlos, SP, 13565-905, Brazil.

<sup>b</sup>Facultad Ciencias Exactas y Naturales, Universidad Nacional de la Pampa, Santa Rosa, La Pampa, Argentina.

<sup>c</sup>Consejo Nacional de Investigaciones Científicas y Técnicas de Argentina (CONICET), Instituto de Ciencias de la Tierra y Ambientales de La Pampa (INCITAP), Santa Rosa, La Pampa, Argentina.

<sup>d</sup>Department of Chemistry, Clemson University, Clemson, SC 29634, USA.

<sup>e</sup>Department of Chemistry, Wake Forest University, Salem Hall, Box 7486, Winston Salem, NC 27109, USA.

\*Corresponding author: George L. Donati

E-mail: donatigl@wfu.edu

## Abbreviations

|           |                                                                     |
|-----------|---------------------------------------------------------------------|
| AAS       | Atomic absorption spectrometry                                      |
| AD        | Aerosol dilution                                                    |
| BG        | Spectral background                                                 |
| CCD       | Charge-coupled device detector                                      |
| CN        | Conventional nebulization                                           |
| CRM       | Certified reference material                                        |
| $C_{sam}$ | Concentration of analyte in the sample                              |
| CV        | Cold vapor generation                                               |
| DLLME     | Dispersive liquid-liquid microextraction                            |
| DSPE      | Dispersive solid-phase extraction                                   |
| EC        | External standard calibration                                       |
| EF        | Enrichment factor                                                   |
| EGCM      | External gas control module                                         |
| EIEs      | Easily ionized elements                                             |
| $E_{sum}$ | Total energy                                                        |
| FAAS      | Flame atomic absorption spectrometry                                |
| FI        | Flow injection                                                      |
| GLS       | Gas-liquid separation                                               |
| HG        | Hydride generation                                                  |
| ICP-OES   | Inductively coupled plasma optical emission spectroscopy            |
| IS        | Internal standardization                                            |
| LDR       | Linear dynamic range                                                |
| LOD       | Limit of detection                                                  |
| LOQ       | Limit of quantification                                             |
| LTE       | Local thermal equilibrium                                           |
| MEC       | Multi-energy calibration                                            |
| MF        | Magnetic field                                                      |
| MFC       | Multi-flow calibration                                              |
| MICAP     | Microwave-sustained inductively coupled atmospheric-pressure plasma |
| MIP-OES   | Microwave-induced plasma optical emission spectrometry              |
| MMC       | Matrix-matching calibration                                         |
| MP-AES    | Microwave plasma atomic emission spectrometry                       |
| MS        | Mass spectrometry                                                   |
| MSIS      | Multimode sample introduction system                                |
| MSPE      | Magnetic solid-phase extraction                                     |
| MW        | Microwave radiation                                                 |
| $n_e$     | Electron number density                                             |
| NGFR      | Nebulization gas flow rate                                          |
| OES       | Optical emission spectrometry                                       |
| PVG       | Photochemical vapor generation                                      |
| REEs      | Rare-earth elements                                                 |
| RF        | Radiofrequency                                                      |
| RSD       | Relative standard deviation                                         |
| SA        | Standard additions                                                  |
| S/B       | Signal-to-background-ratio                                          |
| SDA       | Standard dilution analysis                                          |

|           |                                                |
|-----------|------------------------------------------------|
| SPE       | Solid phase extraction                         |
| SPME      | Solid phase microextraction                    |
| S1        | First solution (sample and standard)           |
| S2        | Second solution (sample and blank)             |
| TD        | Thermal desorption                             |
| TDS       | Total dissolved solids                         |
| $T_e$     | Electron temperature                           |
| $T_g$     | Gas temperature                                |
| Vis       | Visible region of the electromagnetic spectrum |
| VP        | Viewing position                               |
| $W_{tot}$ | Analyte mass transported to plasma             |

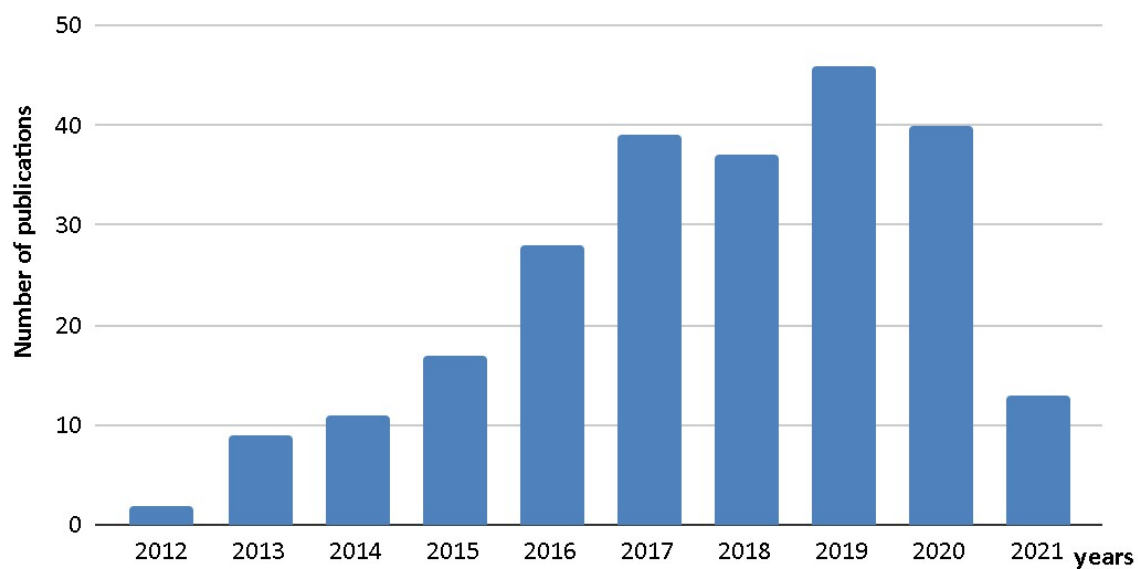

**Figure S1.** MIP-OES publications since the Agilent MP-AES release in 2012, according to the Web of Science.

**Table S1.** Limits of detection ( $\mu\text{g L}^{-1}$ ) calculated for different elements in several samples analyzed by MIP-OES and ICP-OES.

| Sample                                   | Analyte | MIP-OES            |                              | ICP-OES            |                              | Ref. |
|------------------------------------------|---------|--------------------|------------------------------|--------------------|------------------------------|------|
|                                          |         | Emission line (nm) | LOD ( $\mu\text{g L}^{-1}$ ) | Emission line (nm) | LOD ( $\mu\text{g L}^{-1}$ ) |      |
| Fertilizer and animal feed               | Cu      | 324.754 - I        | 2.2                          | 324.754 - I (N)    | 1.7                          | 1    |
|                                          | Fe      | 259.940 - II       | 4.1                          | 259.940 - II (N)   | 1.8                          |      |
|                                          | Mn      | 257.610 - II       | 1.5                          | 257.610 - II (N)   | 5.4                          |      |
|                                          | Zn      | 213.857 - I        | 2.3                          | 213.857 - I (N)    | 1.8                          |      |
| Bio sludge                               | B       | 249.677 - I        | 1.0                          | 249.677 - I (A)    | 1.0                          | 2    |
|                                          | P       | 213.618 - I        | 25                           | 213.618 - I (A)    | 30                           |      |
|                                          | Mo      | 379.825 - I        | 2.0                          | 379.825 - I (A)    | 3.0                          |      |
| Sewage sludge, fired brick, and sediment | Cd      | 228.802 - I        | 32.9                         | 228.802 - I (N)    | 4.6                          | 3    |
|                                          | Cr      | 267.716 - II       | 38.8                         | 425.433 - I (N)    | 63.4                         |      |
|                                          | Cu      | 324.754 - I        | 32.7                         | 324.754 - I (N)    | 28.2                         |      |
|                                          | Ni      | 216.555 - II       | 33.5                         | 352.454 - I (N)    | 52.3                         |      |
|                                          | Pb      | 220.353 - II       | 28.8                         | 405.781 - I (N)    | 345                          |      |
|                                          | Zn      | 213.857 - I        | 26.0                         | 213.857 - I (N)    | 70.9                         |      |
| Instant soup <sup>a</sup>                | Ca      | -                  | -                            | 422.673 - I (R)    | 0.318                        | 4,5  |
|                                          | Cu      | 324.754 - I        | 0.090                        | 324.754 - I (R)    | 0.316                        |      |
|                                          | K       | 769.897 - I        | 4.9                          | 769.896 - I (R)    | 12.2                         |      |
|                                          | Mg      | 285.213 - I        | 1.0                          | 285.213 - I (R)    | 0.129                        |      |
|                                          | Mn      | 403.076 - I        | 0.040                        | 257.610 - II (R)   | 0.173                        |      |
|                                          | Na      | -                  | -                            | 588.995 - I (R)    | 1.50                         |      |
|                                          | P       | 213.618 - I        | 5.4                          | 178.284 - I (R)    | 1.05                         |      |
|                                          | Zn      | 213.857 - I        | 0.88                         | 213.856 - I (R)    | 0.214                        |      |

|                                                                                                                      |    |              |      |                  |      |   |
|----------------------------------------------------------------------------------------------------------------------|----|--------------|------|------------------|------|---|
| Water for injections<br>( <i>Aqua ad iniectabilia</i> )<br>and high-purity water<br>( <i>Aqua valde purificata</i> ) | Al | 394.401 - I  | 0.8  | 394.401 - I (A)  | 0.6  | 6 |
|                                                                                                                      | Al | 396.152 - I  | 0.7  | 396.152 - I (A)  | 0.4  |   |
| Crude oil <sup>a</sup>                                                                                               | Ca | 396.847 - II | NR   | 317.930 - II (R) | 0.01 | 7 |
|                                                                                                                      | Fe | 259.940 - II | 0.01 | 238.204 - II (R) | 0.01 |   |
|                                                                                                                      | K  | 769.897 - I  | 0.06 | 769.897 - I (R)  | 0.01 |   |
|                                                                                                                      | Na | 588.995 - I  | 0.07 | 588.995 - I (R)  | 0.02 |   |
|                                                                                                                      | Ni | 341.476 - I  | NR   | 221.650 - II (R) | 0.01 |   |
|                                                                                                                      | V  | 311.070 - II | NR   | 292.460 - II (R) | 0.01 |   |
| Vinegar                                                                                                              | Al | 396.152 - I  | 0.62 | NA               | NA   | 8 |
|                                                                                                                      | B  | 249.772 - I  | 7.67 | NA               | NA   |   |
|                                                                                                                      | Co | 340.512 - I  | 4.55 | NA               | NA   |   |
|                                                                                                                      | Cr | 425.433 - I  | 0.52 | NA               | NA   |   |
|                                                                                                                      | Mn | 403.076 - I  | 0.35 | NA               | NA   |   |
|                                                                                                                      | Pb | 405.781 - I  | 2.42 | NA               | NA   |   |
| Leather and fur <sup>a,b</sup>                                                                                       | Cd | 228.802 - I  | 1.3  | 228.802 - I (A)  | 0.6  | 9 |
|                                                                                                                      | Co | 350.228 - I  | 1.9  | 238.892 - II (A) | 1.0  |   |
|                                                                                                                      | Cr | 427.480 - I  | 0.9  | 205.560 - II (A) | 0.9  |   |
|                                                                                                                      | Cu | 327.395 - I  | 1.5  | 327.395 - I (A)  | 1.0  |   |
|                                                                                                                      | Hg | 253.652 - I  | 2.0  | 194.164 - II (A) | 2.0  |   |
|                                                                                                                      | Ni | 341.476 - I  | 0.9  | 231.604 - II (A) | 1.4  |   |
|                                                                                                                      | Pb | 405.781 - I  | 1.2  | 220.353 - II (A) | 5.0  |   |
| Agricultural samples <sup>b</sup>                                                                                    | As | 188.979 - I  | 0.46 | NA               | NA   |   |

|                      |                 |                                |       |    |    |    |
|----------------------|-----------------|--------------------------------|-------|----|----|----|
|                      | Bi              | 223.061 - I                    | 0.094 | NA | NA | 10 |
|                      | Ge              | 265.117 - I                    | 0.19  | NA | NA |    |
|                      | Sb              | 217.581 - I                    | 0.46  | NA | NA |    |
|                      | Sn              | 303.412 - I                    | 5.2   | NA | NA |    |
|                      |                 |                                |       | NA | NA |    |
| Diesel and biodiesel | Si              | 251.611 - I<br>(nitric acid)   | 20    | NA | NA |    |
|                      | Si              | 251.611 - I<br>(Microemulsion) | 5     | NA | NA | 11 |
|                      | Si              | 288.158 - I<br>(nitric acid)   | 240   | NA | NA |    |
|                      | Si              | 288.158 - I<br>(Microemulsion) | 5     | NA | NA |    |
|                      |                 |                                |       | NA | NA |    |
| Ethanol fuel         | Cr              | 425.433 - I                    | 0.7   | NA | NA |    |
|                      | Ni              | 352.454 - I                    | 20    | NA | NA | 12 |
|                      | Pb              | 405.781 - I                    | 40    | NA | NA |    |
|                      | V               | 437.923 - I                    | 0.3   | NA | NA |    |
|                      |                 |                                |       | NA | NA |    |
| Fish <sup>a</sup>    | As              | 234.984 - I                    | 0.02  | NA | NA |    |
|                      | Cd              | 228.802 - I                    | 0.01  | NA | NA |    |
|                      | Cu              | 324.754 - I                    | 0.12  | NA | NA | 13 |
|                      | Pb              | 405.781 - I                    | 0.07  | NA | NA |    |
|                      | Hg <sup>†</sup> | 253.652 - I                    | 0.01  | NA | NA |    |

<sup>a</sup> LODs values expressed mg kg<sup>-1</sup>.

<sup>b</sup> Obtained with a multimode sample introduction system by MIP-OES (HG-MIP-OES).

I- atomic line, II- ionic line; N, A and R represent plasma viewing not informed, axial and radial, respectively.

NA- Not determined.

NR - Not reported. The LOD reported by the authors was 0.00 µg L<sup>-1</sup>. We prefer the term not reported in this case.

**Table S2.** MP-AES commercially available models and their general characteristics.<sup>a</sup>



| <b>Agilent MP-AES</b>                | <b>4100</b>                                              | <b>4200</b>                                          | <b>4210</b>                                          | <b>Improvement</b>                                                                                                                       |
|--------------------------------------|----------------------------------------------------------|------------------------------------------------------|------------------------------------------------------|------------------------------------------------------------------------------------------------------------------------------------------|
| <b>Waveguide</b>                     | Microwave assembly (waveguide), Part number: G8000-64126 | Improved waveguide                                   | Improved waveguide                                   | Increases the torch useful life and long-term stability                                                                                  |
| <b>Number of temperature sensors</b> | 1                                                        | 2                                                    | 2                                                    | Better waveguide and magnetron temperature control                                                                                       |
| <b>Torch design</b>                  | Easy-fit, black base                                     | Easy-fit, blue base with a thicker wall <sup>b</sup> | Easy-fit, blue base with a thicker wall <sup>b</sup> | Contributes to higher plasma temperature and improves performance with difficult samples (high TDS), reducing cleaning time and downtime |
| <b>Total dissolved solids (TDS)</b>  | 1 % maximum                                              | 3 % maximum                                          | 3 % maximum                                          | More robust torch assembly, without compromising LODs                                                                                    |

<sup>a</sup> Pat. N<sup>o</sup>s: US006683272B2, US007030979B2, US009345121B2, US009247629B2

<sup>b</sup> Not compatible with earlier model 4100 MP-AES

**Table S3.** Performance of nebulizers used with MIP-OES.<sup>14</sup>

|                              | <b>Parameter</b>              |              |                              |         | <b>Performance depending on the matrix</b> |                                          |                                            |                   |                                   |
|------------------------------|-------------------------------|--------------|------------------------------|---------|--------------------------------------------|------------------------------------------|--------------------------------------------|-------------------|-----------------------------------|
|                              | Plasma excitation temperature | Plasma $n_e$ | Solvent transport efficiency | LOD     | HNO <sub>3</sub> (1 % v/v)                 | H <sub>2</sub> SO <sub>4</sub> (1 % v/v) | EIEs (100 mg L <sup>-1</sup> Na, K and Ba) | Ethanol (1 % v/v) | Carbon (1000 mg L <sup>-1</sup> ) |
| <b>Nebulizer</b>             |                               |              |                              |         |                                            |                                          |                                            |                   |                                   |
| OneNeb <sup>®</sup> series 1 |                               |              |                              |         |                                            |                                          |                                            |                   |                                   |
| OneNeb <sup>®</sup> series 2 | Lowest                        | Lowest       | Highest                      | Lowest  | Best                                       | Best                                     |                                            | Best              | Best                              |
| Mira Mist <sup>®</sup>       | Highest                       | Highest      | Lowest                       |         |                                            |                                          | Best                                       |                   |                                   |
| Concentric                   |                               |              |                              | Highest | Worst                                      | Worst                                    | Worst                                      | Worst             | Worst                             |

## References

- 1 W. Li, P. Simmons, D. Shrader, T. J. Herrman and S. Y. Dai, *Talanta*, 2013, **112**, 43–48.
- 2 V. Sreenivasulu, N. S. Kumar, V. Dharmendra, M. Asif, V. Balaram, H. Zhengxu and Z. Zhen, *Appl. Sci.*, 2017, **7**, 1–10.
- 3 F. Baraud, A. Zaiter, S. Porée and L. Leleyter, *SN Appl. Sci.*, 2020, **2**, 1536.
- 4 L. São Bernardo Carvalho, C. Santos Silva, J. Araújo Nóbrega, E. Santos Boa Morte, D. C. Muniz Batista Santos and M. G. Andrade Korn, *J. Food Compos. Anal.*, 2020, **86**, 103376.
- 5 A. Krejčová, T. Černohorský and D. Meixner, *Food Chem.*, 2007, **105**, 242–247.
- 6 T. O. Samarina, D. S. Volkov, I. V. Mikheev and M. A. Proskurnin, *Anal. Lett.*, 2018, **51**, 659–672.
- 7 J. Nelson, G. Gilleland, L. Poirier, D. Leong, P. Hajdu and F. Lopez-Linares, *Energy and Fuels*, 2015, **29**, 5587–5594.
- 8 N. Ozbek, M. Koca and S. Akman, *Food Anal. Methods*, 2016, **9**, 2246–2250.
- 9 Y. Zhao, Z. Li, A. Ross, Z. Huang, W. Chang, K. Ou-Yang, Y. Chen and C. Wu, *Spectrochim. Acta - Part B At. Spectrosc.*, 2015, **112**, 6–9.
- 10 R. C. Machado, C. D. B. Amaral, J. A. Nóbrega and A. R. A. Nogueira, *J. Agric. Food Chem.*, 2017, **65**, 4839–4842.
- 11 R. S. Amais, G. L. Donati, D. Schiavo and J. A. Nóbrega, *Microchem. J.*, 2013, **106**, 318–322.
- 12 G. L. Donati, R. S. Amais, D. Schiavo and J. A. Nóbrega, *J. Anal. At. Spectrom.*, 2013, **28**, 755–759.
- 13 S. E. Gallego Ríos, G. A. Peñuela and C. M. Ramírez Botero, *Food Anal. Methods*, 2017, **10**, 3407–3414.
- 14 A. B. S. Silva, J. M. Higuera, C. E. M. Braz, R. C. Machado and A. R. A. Nogueira, *Spectrochim. Acta - Part B At. Spectrosc.*, 2020, **168**, 105867.
